# Supplementary material for: Toward Systems Neuroscience of ADHD: A Meta-Analysis of 55 fMRI Studies
Source: Atypon-hosted journal article supplement (doi:10.1176/appi.ajp.2012.11101521), 2012-10-01
Supplement: 1038_ds001.pdf [file 1038_ds001.pdf]

## **SUPPLEMENTAL MATERIAL**

### **A1. DETAILED SEARCH STRATEGY**

#### **Update of the search by Dickstein et al. (1)**

The updated search was conducted with the restriction period: 2005-2011 (we selected 2005, instead of 2006, to avoid missing papers in press and unavailable in the electronic databases at the time of the Dickstein et al. (1) search). The first main search was performed on January 27, 2011 and updated (after the data extraction from the relevant papers retrieved in the first main search) on June 30, 2011. Studies published in English as well as in other languages were included in the search.

#### **Recheck of the search by Dickstein et al. (1)**

Since Dickstein et al. (1) used a more restricted set of databases and search terms compared to the ones used in the present study, we repeated the search for the period covered by their meta-analysis using the same databases and search terms of the updated search, to ensure that Dickstein et al. (1) had found all eligible studies.

We searched the following databases: PubMed, Ovid (including PsycINFO and Ovid MEDLINE®), EMBASE, Web of Science (SCI-EXPANDED, SSCI, A&HCI), ERIC, CINHALL, and “NeuroSynth”. We also manually screened the references of included studies. Here, we report the list of search terms for each database:

#### ***PUBMED (MEDLINE)***

##### **Search terms:**

(ADHD OR attention deficit hyperactivity disorder OR attention-deficit/hyperactivity disorder OR attention deficit disorder with hyperactivity OR hyperkinetic syndrome OR syndrome hyperkinetic OR hyperactivity disorder OR hyperactive child syndrome OR childhood hyperkinetic syndrome OR attention deficit disorder OR deficit disorder attention OR disorder attention deficit OR addh OR overactive child syndrome OR attention deficit hyperkinetic disorder OR hyperkinetic disorder OR attention deficit disorder hyperactivity OR child attention deficit disorder OR hyperkinetic syndrome childhood OR hyperkinesis) AND (Imaging OR

neuroimaging OR magnetic resonance imaging OR MRI OR nuclear magnetic resonance imaging OR NMR imaging OR functional imaging OR functional magnetic imaging OR Functional MRI OR fMRI OR Positron emission tomography OR PET OR Tomography Positron-Emission OR positron emission tomographic scan OR positron tomography OR Positron emission tomography computer assisted OR Computer assisted positron emission tomography OR Positron emission computed tomography OR Single Photon Emission Compute Tomography OR CT Scan Single-Photon Emission OR Emission-Computed Tomography Single-Photon OR Tomography Single-Photon Emission-Computed OR SPECT OR computer assisted tomography single photon emission OR emission computer tomography single photon OR tomography emission-computed single-photon)

Limits: 2005-2011, human

### ***OVID databases***

#### **PsycInfo**

##### Search terms:

(ADHD OR attention deficit hyperactivity disorder OR attention deficit disorder with hyperactivity OR hyperkinetic syndrome OR syndrome hyperkinetic OR hyperactivity disorder OR hyperactive child syndrome OR childhood hyperkinetic syndrome OR attention deficit disorder OR deficit disorder attention OR disorder attention deficit OR addh OR overactive child syndrome OR attention deficit hyperkinetic disorder OR hyperkinetic disorder OR attention deficit disorder hyperactivity OR child attention deficit disorder OR hyperkinetic syndrome childhood OR hyperkinesis OR Attention deficit disorder / OR ((attenti\$) adj3 (deficit\$ OR disorder\$ or hyperactiv\$ OR hyper?activ\$ OR adhd OR addh OR ad??hd)) OR ((hyperkin\$ OR hyper?kin\$) adj3 (deficit\$ OR disorder\$ OR hkd))) AND (Imaging OR neuroimaging OR magnetic resonance imaging OR MRI OR nuclear magnetic resonance imaging OR NMR imaging OR functional imaging OR functional magnetic imaging OR Functional MRI OR fMRI OR Positron emission tomography OR PET OR Tomography Positron-Emission OR positron emission tomographic scan OR positron tomography OR Positron emission tomography computer assisted OR Computer assisted positron emission tomography OR Positron emission computed tomography OR Single Photon Emission Compute Tomography OR CT Scan Single-Photon Emission OR Emission-Computed Tomography Single-Photon OR Tomography Single-Photon Emission-Computed OR SPECT OR computer assisted tomography single photon emission OR emission computer tomography single photon OR tomography emission-computed single-photon)

Limits: 2005-to date; peer review; human

### **Ovid Medline**

##### Search terms:

(ADHD OR attention deficit hyperactivity disorder OR attention deficit disorder with hyperactivity OR hyperkinetic syndrome OR syndrome hyperkinetic OR hyperactivity disorder OR hyperactive child syndrome OR childhood hyperkinetic syndrome OR attention deficit disorder OR deficit disorder attention OR disorder attention deficit OR addh OR overactive child syndrome OR attention deficit hyperkinetic disorder OR hyperkinetic disorder OR attention

deficit disorder hyperactivity OR child attention deficit disorder OR hyperkinetic syndrome childhood OR hyperkinesis OR Attention deficit disorder / OR ((attenti\$) adj3 (deficit\$ OR disorder\$ or hyperactiv\$ OR hyper?activ\$ OR adhd OR addh OR ad??hd)) OR ((hyperkin\$ OR hyper?kin\$) adj3 (deficit\$ OR disorder\$ OR hkd))) AND (Imaging OR neuroimaging OR magnetic resonance imaging OR MRI OR nuclear magnetic resonance imaging OR NMR imaging OR functional imaging OR functional magnetic imaging OR Functional MRI OR fMRI OR Positron emission tomography OR PET OR Tomography Positron-Emission OR positron emission tomographic scan OR positron tomography OR Positron emission tomography computer assisted OR Computer assisted positron emission tomography OR Positron emission computed tomography OR Single Photon Emission Compute Tomography OR CT Scan Single-Photon Emission OR Emission-Computed Tomography Single-Photon OR Tomography Single-Photon Emission-Computed OR SPECT OR computer assisted tomography single photon emission OR emission computer tomography single photon OR tomography emission-computed single-photon)

Limits: 2005-to date; humans

### ***EMBASE + EMBASE CLASSIC***

#### Search terms:

(ADHD OR attention deficit hyperactivity disorder OR attention deficit disorder with hyperactivity OR hyperkinetic syndrome OR syndrome hyperkinetic OR hyperactivity disorder OR hyperactive child syndrome OR childhood hyperkinetic syndrome OR attention deficit disorder OR deficit disorder attention OR disorder attention deficit OR addh OR overactive child syndrome OR attention deficit hyperkinetic disorder OR hyperkinetic disorder OR attention deficit disorder hyperactivity OR child attention deficit disorder OR hyperkinetic syndrome childhood OR hyperkinesis OR Attention deficit disorder / OR ((attenti\$) adj3 (deficit\$ OR disorder\$ or hyperactiv\$ OR hyper?activ\$ OR adhd OR addh OR ad??hd)) OR ((hyperkin\$ OR hyper?kin\$) adj3 (deficit\$ OR disorder\$ OR hkd))) AND (Imaging OR neuroimaging OR magnetic resonance imaging OR MRI OR nuclear magnetic resonance imaging OR NMR imaging OR functional imaging OR functional magnetic imaging OR Functional MRI OR fMRI OR Positron emission tomography OR PET OR Tomography Positron-Emission OR positron emission tomographic scan OR positron tomography OR Positron emission tomography computer assisted OR Computer assisted positron emission tomography OR Positron emission computed tomography OR Single Photon Emission Compute Tomography OR CT Scan Single-Photon Emission OR Emission-Computed Tomography Single-Photon OR Tomography Single-Photon Emission-Computed OR SPECT OR computer assisted tomography single photon emission OR emission computer tomography single photon OR tomography emission-computed single-photon)

Limits: 2005-to date; human

### ***WEB OF KNOWLEDGE***

**(Web of science (science citation index expanded), Biological abstracts, Biosis, Food science and technology abstracts)**

#### Search terms:

(ADHD OR attention deficit hyperactivity disorder OR attention deficit disorder with hyperactivity OR hyperkinetic syndrome OR syndrome hyperkinetic OR hyperactivity disorder OR hyperactive child syndrome OR childhood hyperkinetic syndrome OR attention deficit disorder OR deficit disorder attention OR disorder attention deficit OR addh OR overactive child syndrome OR attention deficit hyperkinetic disorder OR hyperkinetic disorder OR attention deficit disorder hyperactivity OR child attention deficit disorder OR hyperkinetic syndrome childhood OR hyperkinesis) AND (Imaging OR neuroimaging OR magnetic resonance imaging OR MRI OR nuclear magnetic resonance imaging OR NMR imaging OR functional imaging OR functional magnetic imaging OR Functional MRI OR fMRI OR Positron emission tomography OR PET OR Tomography Positron-Emission OR positron emission tomographic scan OR positron tomography OR Positron emission tomography computer assisted OR Computer assisted positron emission tomography OR Positron emission computed tomography OR Single Photon Emission Compute Tomography OR CT Scan Single-Photon Emission OR Emission-Computed Tomography Single-Photon OR Tomography Single-Photon Emission-Computed OR SPECT OR computer assisted tomography single photon emission OR emission computer tomography single photon OR tomography emission-computed single-photon)

Limits: 2005-to date: articles and abstracts

### ***ERIC***

#### Search terms:

(ADHD OR attention deficit hyperactivity disorder OR attention deficit disorder with hyperactivity OR hyperkinetic syndrome OR syndrome hyperkinetic OR hyperactivity disorder OR hyperactive child syndrome OR childhood hyperkinetic syndrome OR attention deficit disorder OR deficit disorder attention OR disorder attention deficit OR addh OR overactive child syndrome OR attention deficit hyperkinetic disorder OR hyperkinetic disorder OR attention deficit disorder hyperactivity OR child attention deficit disorder OR hyperkinetic syndrome childhood OR hyperkinesis) AND (Imaging OR neuroimaging OR magnetic resonance imaging OR MRI OR nuclear magnetic resonance imaging OR NMR imaging OR functional imaging OR functional magnetic imaging OR Functional MRI OR fMRI OR Positron emission tomography OR PET OR Tomography Positron-Emission OR positron emission tomographic scan OR positron tomography OR Positron emission tomography computer assisted OR Computer assisted positron emission tomography OR Positron emission computed tomography OR Single Photon Emission Compute Tomography OR CT Scan Single-Photon Emission OR Emission-Computed Tomography Single-Photon OR Tomography Single-Photon Emission-Computed OR SPECT OR computer assisted tomography single photon emission OR emission computer tomography single photon OR tomography emission-computed single-photon)

Limits: 2005-to date; peer reviewed

### ***CINAHAL PLUS***

#### Search terms:

(ADHD OR attention deficit hyperactivity disorder OR attention deficit disorder with hyperactivity OR hyperkinetic syndrome OR syndrome hyperkinetic OR hyperactivity disorder OR hyperactive child syndrome OR childhood hyperkinetic syndrome OR attention deficit

disorder OR deficit disorder attention OR disorder attention deficit OR addh OR overactive child syndrome OR attention deficit hyperkinetic disorder OR hyperkinetic disorder OR attention deficit disorder hyperactivity OR child attention deficit disorder OR hyperkinetic syndrome childhood OR hyperkinesis) AND (Imaging OR neuroimaging OR magnetic resonance imaging OR MRI OR nuclear magnetic resonance imaging OR NMR imaging OR functional imaging OR functional magnetic imaging OR Functional MRI OR fMRI OR Positron emission tomography OR PET OR Tomography Positron-Emission OR positron emission tomographic scan OR positron tomography OR Positron emission tomography computer assisted OR Computer assisted positron emission tomography OR Positron emission computed tomography OR Single Photon Emission Compute Tomography OR CT Scan Single-Photon Emission OR Emission-Computed Tomography Single-Photon OR Tomography Single-Photon Emission-Computed OR SPECT OR computer assisted tomography single photon emission OR emission computer tomography single photon OR tomography emission-computed single-photon)

Limits: 2005-2011; human peer reviewed

## **A2. STUDIES INCLUDED IN THE META-ANALYSIS: DETAILED DESCRIPTION OF INCLUDED/EXCLUDED STUDIES**

The first search (performed on January 27, 2011) of PubMed (Medline), Ovid, EMBASE, Web of Science, ERIC, and CINAHAL (after February 2006) provided a total of 5072 citations. The numbers of citations found in each database were as follows: Pubmed: n=889; PsycInfo: n=426; Ovid Medline: n= 935; Embase+Embase classic: n= 1249; Web of Knowledge: n= 1419; Eric: n= 75; CINAHAL Plus: n= 78. After removing duplicates, 2285 papers remained. Of these, 2204 articles were discarded because review of the abstracts supported the conclusion that they clearly did not meet the eligibility criteria. Among the remaining 81 studies, 10 (2-11) had already been included in Dickstein et al. (1) The full text of the remaining 71 papers was examined in more detail. Among these, one (12) did not use formal criteria for the diagnosis of ADHD, three (13-15) did not report 3D coordinates, five (16-20) did not perform “between groups” comparisons, 11 (21-31) were based on an *a priori* ROI analysis, two (32;33) did not include a control group, one (34) did not report comparison between untreated participants with ADHD and controls, one (35) contrasted controls and adults with ADHD in partial remission or full syndrome, without reporting results of the contrast “adults with current ADHD vs. controls”, and one (36) reported only deactivation. Two additional potentially pertinent studies were retrieved after hand-search of reference lists but both of them were not considered suitable for the meta-analysis since one (37) did not report 3D coordinates and the other (38) was based on an *a priori* ROI. After exclusion of these papers, 46 articles remained. Of these, five (39-43) used SPECT, two (44;45) assessed participants by near infrared spectroscopy, one (46) relied on PET, and another one (47) was based on arterial spin labeling. The paucity of studies using techniques other than fMRI confirmed the appropriateness of our choice to exclude studies using imaging techniques other than task-based fMRI.

Therefore, a total of 37 articles were identified for inclusion in the meta-analysis from the main search performed on January 27, 2011. The additional search on June 30, 2011 retrieved nine (48-56) additional papers that met eligibility criteria for inclusion.

The search of PubMed (Medline), Ovid, EMBASE, Web of Science, ERIC, and CINHALL also confirmed that Dickstein et al. (1) had found all eligible articles published before February 2006. Nine (2;4;6-9;57-59) of the studies retrieved by Dickstein et al. (1) presented “between” comparisons and were therefore included in the present meta-analysis. We excluded nine studies originally included in Dickstein et al. (1) since three (3;9;60) of them did not present “between groups” comparisons, two (5;61) presented data on participants with persistent or remitted ADHD (without specifying values only for those with persistent ADHD), one (11) was based on *a priori* ROI, and three (62-64) were based on PET.

Therefore, in total, the present meta-analysis included 55 papers. Sixteen papers (10;49;50;65-77) included adults with ADHD, while 39 (2;4;6-8;48;51-59;78-101) assessed children with ADHD (“children” refers to participants  $\leq 18$  years-old). We note that the following studies included the same participants (same number of participants, same mean age and age standard deviation): two papers by Kobel et al. (81;82); two sets of papers (90;92) and (52;53), from Rubia et al. assessing children with ADHD; two papers by Cubillo et al. (49;50) assessing adults with ADHD; and two papers by Spinelli et al. (55;56). Therefore, data from these studies related to the same participants were pooled in the same experiment line when entered into the GingerALE file.

## References

1. Dickstein SG, Bannon K, Castellanos FX, Milham MP. The neural correlates of attention deficit hyperactivity disorder: an ALE meta-analysis. *J Child Psychol Psychiatry* 2006;47:1051-1062.
2. Booth JR, Burman DD, Meyer JR, Lei Z, Trommer BL, Davenport ND, Li W, Parrish TB, Gitelman DR, Mesulam MM. Larger deficits in brain networks for response inhibition than for visual selective attention in attention deficit hyperactivity disorder (ADHD). *J Child Psychol Psychiatry* 2005;46:94-111.
3. Pliszka SR, Glahn DC, Semrud-Clikeman M, Franklin C, Perez R 3rd, Xiong J, Liotti M. Neuroimaging of inhibitory control areas in children with attention deficit hyperactivity disorder who were treatment naive or in long-term treatment. *Am J Psychiatry* 2006;163:1052-1060.
4. Rubia K, Smith AB, Brammer MJ, Toone B, Taylor E. Abnormal brain activation during inhibition and error detection in medication-naive adolescents with ADHD. *Am J Psychiatry* 2005;162:1067-1075.
5. Schulz KP, Tang CY, Fan J, Marks DJ, Newcorn JH, Cheung AM, Halperin JM. Differential prefrontal cortex activation during inhibitory control in adolescents with and without childhood attention-deficit/hyperactivity disorder. *Neuropsychology* 2005;19:390-402.
6. Silk T, Vance A, Rinehart N, Egan G, O'Boyle M, Bradshaw JL, Cunnington R. Fronto-parietal activation in attention-deficit hyperactivity disorder, combined type: functional magnetic resonance imaging study. *Br J Psychiatry* 2005;187:282-283.
7. Smith AB, Taylor E, Brammer M, Toone B, Rubia K. Task-specific hypoactivation in prefrontal and temporoparietal brain regions during motor inhibition and task switching in medication-naive children and adolescents with attention deficit hyperactivity disorder. *Am J Psychiatry* 2006;163:1044-1051.
8. Tamm L, Menon V, Reiss AL. Parietal attentional system aberrations during target detection in adolescents with attention deficit hyperactivity disorder: event-related fMRI evidence. *Am J Psychiatry* 2006;163:1033-1043.
9. Vaidya CJ, Bunge SA, Dudukovic NM, Zalecki CA, Elliott GR, Gabrieli JD. Altered neural substrates of cognitive control in childhood ADHD: evidence from functional magnetic resonance imaging. *Am J Psychiatry* 2005;162:1605-1613.
10. Valera EM, Faraone SV, Biederman J, Poldrack RA, Seidman LJ. Functional neuroanatomy of working memory in adults with attention-deficit/hyperactivity disorder. *Biol Psychiatry* 2005;57:439-447.
11. Zang YF, Jin Z, Weng XC, Zhang L, Zeng YW, Yang L, Wang YF, Seidman LJ, Faraone SV. Functional MRI in attention-deficit hyperactivity disorder: evidence for hypofrontality. *Brain Dev* 2005;27:544-550.



12. Li F, Li BJ, Hu DW, Liu J, He Z, Zhou SK. A functional MRI study in ADHD children with impulsivity. *Zhongguo Dang Dai Er Ke Za Zhi* 2010;12:24-28.
13. Brotman MA, Rich BA, Guyer AE, Lunsford JR, Horsey SE, Reising MM, Thomas LA, Fromm SJ, Towbin K, Pine DS, Leibenluft E. Amygdala activation during emotion processing of neutral faces in children with severe mood dysregulation versus ADHD or bipolar disorder. *Am J Psychiatry* 2010;167:61-69.
14. Depue BE, Burgess GC, Willcutt EG, Bidwell LC, Ruzic L, Banich MT. Symptom-correlated brain regions in young adults with combined-type ADHD: their organization, variability, and relation to behavioral performance. *Psychiatry Res* 2010;182:96-102.
15. Wolf R, Vasic N. Functional neuroimaging of cognition in adults with ADHD. *Nervenheilkunde: Zeitschrift fur interdisziplinare Fortbildung* 2010; 29: 21-30.
16. Depue BE, Burgess GC, Willcutt EG, Ruzic L, Banich MT. Inhibitory control of memory retrieval and motor processing associated with the right lateral prefrontal cortex: evidence from deficits in individuals with ADHD. *Neuropsychologia* 2010;48:3909-3917.
17. Durston S, Fossella JA, Mulder MJ, Casey BJ, Ziermans TB, Vessaz MN, Van Engeland H. Dopamine transporter genotype conveys familial risk of attention-deficit/hyperactivity disorder through striatal activation. *J Am Acad Child Adolesc Psychiatry* 2008;47:61-67.
18. Gonzalez-Garrido AA, Barrios FA, de la Serna-Tuya JM, Cocula-Leon H, Gomez-Velazquez FR. Methylphenidate and short-term memory in young females with attention deficit hyperactivity disorder. A study using functional magnetic resonance imaging. *Rev Neurol* 2009;48:509-514.
19. Gonzalez-Garrido AA, de la Serna-Tuya JM, Barrios FA, Gomez-Velazquez FR, Ramos-Loyo J, Cocula-Leon H. Methylphenidate and verbal processing with emotional content in young females with attention deficit disorder. *Revista Mexicana de Neurociencia* 2009;10:427-433.
20. Lu Y, Geng D, feng X, Du Y, Zhao Z. MRI study of verbal working memory in children with attention deficit hyperactivity disorder. *Chinese Journal of Radiology* 2006; 40: 1129-1133.
21. Burgess GC, Depue BE, Ruzic L, Willcutt EG, Du YP, Banich MT. Attentional control activation relates to working memory in attention-deficit/hyperactivity disorder. *Biol Psychiatry* 2010;67:632-640.
22. Durston S, Mulder M, Casey BJ, Ziermans T, Van Engeland H. Activation in ventral prefrontal cortex is sensitive to genetic vulnerability for attention-deficit hyperactivity disorder. *Biol Psychiatry* 2006;60:1062-1070.
23. Epstein JN, Casey BJ, Tonev ST, Davidson MC, Reiss AL, Garrett A, Hinshaw SP, Greenhill LL, Glover G, Shafritz KM, Vitolo A, Kotler LA, Jarrett MA, Spicer J. ADHD- and medication-related brain activation effects in concordantly affected parent-child dyads with ADHD. *J Child Psychol Psychiatry* 2007;48:899-913.

24. Epstein JN, Delbello MP, Adler CM, Altaye M, Kramer M, Mills NP, Strakowski SM, Holland S. Differential patterns of brain activation over time in adolescents with and without attention deficit hyperactivity disorder (ADHD) during performance of a sustained attention task. *Neuropediatrics* 2009;40:1-5.
25. Mulder MJ, Baeyens D, Davidson MC, Casey BJ, van den Ban E, van Engeland H, Durston S. Familial vulnerability to ADHD affects activity in the cerebellum in addition to the prefrontal systems. *J Am Acad Child Adolesc Psychiatry* 2008;47:68-75.
26. Plichta MM, Vasic N, Wolf RC, Lesch KP, Brummer D, Jacob C, Fallgatter AJ, Grön G. Neural hyporesponsiveness and hyperresponsiveness during immediate and delayed reward processing in adult attention-deficit/hyperactivity disorder. *Biol Psychiatry* 2009;65:7-14.
27. Scheres A, Milham MP, Knutson B, Castellanos FX. Ventral striatal hyporesponsiveness during reward anticipation in attention-deficit/hyperactivity disorder. *Biol Psychiatry* 2007;61:720-724.
28. Stevens MC, Pearlson GD, Kiehl KA. An FMRI auditory oddball study of combined-subtype attention deficit hyperactivity disorder. *Am J Psychiatry* 2007;164:1737-1749.
29. Suskauer SJ, Simmonds DJ, Caffo BS, Denckla MB, Pekar JJ, Mostofsky SH. fMRI of intrasubject variability in ADHD: anomalous premotor activity with prefrontal compensation. *J Am Acad Child Adolesc Psychiatry* 2008;47:1141-1150.
30. Suskauer SJ, Simmonds DJ, Fotedar S, Blankner JG, Pekar JJ, Denckla MB, Mostofsky SH. Functional magnetic resonance imaging evidence for abnormalities in response selection in attention deficit hyperactivity disorder: differences in activation associated with response inhibition but not habitual motor response. *J Cogn Neurosci* 2008;20:478-493.
31. Vloet TD, Gilsbach S, Neufang S, Fink GR, Herpertz-Dahlmann B, Konrad K. Neural mechanisms of interference control and time discrimination in attention-deficit/hyperactivity disorder. *J Am Acad Child Adolesc Psychiatry* 2010;49:356-367.
32. Hoekzema E, Carmona S, Tremols V, Gispert JD, Guitart M, Fauquet J, Rovira M, Bielsa A, Soliva JC, Tomas X, Bulbena A, Ramos-Quiroga A, Casas M, Tobeña A, Vilarroya O. Enhanced neural activity in frontal and cerebellar circuits after cognitive training in children with attention-deficit/hyperactivity disorder. *Hum Brain Mapp* 2010;31:1942-1950.
33. Solanto MV, Schulz KP, Fan J, Tang CY, Newcorn JH. Event-related FMRI of inhibitory control in the predominantly inattentive and combined subtypes of ADHD. *J Neuroimaging* 2009;19:205-212.
34. Konrad K, Neufang S, Fink GR, Herpertz-Dahlmann B. Long-term effects of methylphenidate on neural networks associated with executive attention in children with ADHD: results from a longitudinal functional MRI study. *J Am Acad Child Adolesc Psychiatry* 2007;46:1633-1641.

35. Schneider MF, Krick CM, Retz W, Hengesch G, Retz-Junginger P, Reith W, Rösler M. Impairment of fronto-striatal and parietal cerebral networks correlates with attention deficit hyperactivity disorder (ADHD) psychopathology in adults - a functional magnetic resonance imaging (fMRI) study. *Psychiatry Res* 2010;183:75-84.
36. Peterson BS, Potenza MN, Wang Z, Zhu H, Martin A, Marsh R, Plessen KJ, Yu S. An FMRI study of the effects of psychostimulants on default-mode processing during Stroop task performance in youths with ADHD. *Am J Psychiatry* 2009;166:1286-1294.
37. Krauel K. Characterisation of Memory Abnormalities in Patients with Attention Deficit Hyperactivity Disorder (ADHD). *Klin Neurophysiol* 2010; 41:162-64.
38. Schlochtermeyer L, Stoy M, Schlagenhaut F, Wrase J, Park SQ, Friedel E, Huss M, Lehmkuhl U, Heinz A, Ströhle A. Childhood methylphenidate treatment of ADHD and response to affective stimuli. *Eur Neuropsychopharmacol* 2011;21:646-654.
39. Amen DG, Hanks C, Prunella J. Preliminary evidence differentiating ADHD using brain SPECT imaging in older patients. *J Psychoactive Drugs* 2008;40:139-146.
40. Gardner A, Salmaso D, Varrone A, Sanchez-Crespo A, Bejerot S, Jacobsson H, Larsson SA, Pagni M. Differences at brain SPECT between depressed females with and without adult ADHD and healthy controls: etiological considerations. *Behav Brain Funct* 2009;5:37.
41. Hesse S, Ballaschke O, Barthel H, Sabri O. Dopamine transporter imaging in adult patients with attention-deficit/hyperactivity disorder. *Psychiatry Res* 2009;171:120-128.
42. Lee JS, Kim BN, Kang E, Lee DS, Kim YK, Chung JK, Lee MC, Cho SC. Regional cerebral blood flow in children with attention deficit hyperactivity disorder: comparison before and after methylphenidate treatment. *Hum Brain Mapp* 2005;24:157-164.
43. Oc OY, Agaoglu B, Berk F, Komsuoglu S, Coskun A, Karakaya I. Evaluation of cerebral blood flow and electrical activity in ADHD. *Klinik Psikiyatri Dergisi: The Journal of Clinical Psychiatry* 2008;11:53-60.
44. Jourdan MS, Cutini S, Weber P, Schroeter ML. Right prefrontal brain activation due to Stroop interference is altered in attention-deficit hyperactivity disorder - A functional near-infrared spectroscopy study. *Psychiatry Res* 2009;173:190-195.
45. Schecklmann M, Romanos M, Bretscher F, Plichta MM, Warnke A, Fallgatter AJ. Prefrontal oxygenation during working memory in ADHD. *J Psychiatr Res* 2010;44:621-628.
46. Volkow ND, Wang GJ, Newcorn J, Telang F, Solanto MV, Fowler JS, Logan J, Ma Y, Schulz K, Pradhan K, Wong C, Swanson JM. Depressed dopamine activity in caudate and preliminary evidence of limbic involvement in adults with attention-deficit/hyperactivity disorder. *Arch Gen Psychiatry* 2007;64:932-940.

47. O'Gorman RL, Mehta MA, Asherson P, Zelaya FO, Brookes KJ, Toone BK, Alsop DC, Williams SC. Increased cerebral perfusion in adult attention deficit hyperactivity disorder is normalised by stimulant treatment: a non-invasive MRI pilot study. *Neuroimage* 2008;42:36-41.
48. Braet W, Johnson KA, Tobin CT, Acheson R, McDonnell C, Hawi Z, Barry E, Mulligan A, Gill M, Bellgrove MA, Robertson IH, Garavan H. fMRI activation during response inhibition and error processing: the role of the DAT1 gene in typically developing adolescents and those diagnosed with ADHD. *Neuropsychologia* 2011;49:1641-1650.
49. Cubillo A, Halari R, Giampietro V, Taylor E, Rubia K. Fronto-striatal underactivation during interference inhibition and attention allocation in grown up children with attention deficit/hyperactivity disorder and persistent symptoms. *Psychiatry Res* 2011;193:17-27.
50. Cubillo A, Halari R, Smith A, Taylor E, Rubia K. A review of fronto-striatal and fronto-cortical brain abnormalities in children and adults with Attention Deficit Hyperactivity Disorder (ADHD) and new evidence for dysfunction in adults with ADHD during motivation and attention. *Cortex* 2012; 48 (4):194-215.
51. Prehn-Kristensen A, Krauel K, Hinrichs H, Fischer J, Malecki U, Schuetze H, Wolff S, Jansen O, Duzel E, Baving L. Methylphenidate does not improve interference control during a working memory task in young patients with attention-deficit hyperactivity disorder. *Brain Res* 2011;1388:56-68.
52. Rubia K, Halari R, Mohammad AM, Taylor E, Brammer M. Methylphenidate normalizes frontocingulate underactivation during error processing in attention-deficit/hyperactivity disorder. *Biol Psychiatry* 2011;70:255-262.
53. Rubia K, Halari R, Cubillo A, Smith AB, Mohammad AM, Brammer M, Taylor E. Methylphenidate normalizes fronto-striatal underactivation during interference inhibition in medication-naive boys with attention-deficit hyperactivity disorder. *Neuropsychopharmacology* 2011;36:1575-1586.
54. Rubia K, Cubillo A, Woolley J, Brammer MJ, Smith A. Disorder-specific dysfunctions in patients with attention-deficit/hyperactivity disorder compared to patients with obsessive-compulsive disorder during interference inhibition and attention allocation. *Hum Brain Mapp* 2011;32:601-611.
55. Spinelli S, Joel S, Nelson TE, Vasa RA, Pekar JJ, Mostofsky SH. Different neural patterns are associated with trials preceding inhibitory errors in children with and without attention-deficit/hyperactivity disorder. *J Am Acad Child Adolesc Psychiatry* 2011;50:705-715.
56. Spinelli S, Vasa RA, Joel S, Nelson TE, Pekar JJ, Mostofsky SH. Variability in post-error behavioral adjustment is associated with functional abnormalities in the temporal cortex in children with ADHD. *J Child Psychol Psychiatry* 2011;52:808-816.
57. Durston S, Tottenham NT, Thomas KM, Davidson MC, Eigsti IM, Yang Y, Ulug AM, Casey BJ. Differential patterns of striatal activation in young children with and without ADHD. *Biol Psychiatry* 2003;53:871-878.

58. Rubia K, Overmeyer S, Taylor E, Brammer M, Williams SC, Simmons A, Bullmore ET. Hypofrontality in attention deficit hyperactivity disorder during higher-order motor control: a study with functional MRI. *Am J Psychiatry* 1999;156:891-896.
59. Tamm L, Menon V, Ringel J, Reiss AL. Event-related fMRI evidence of frontotemporal involvement in aberrant response inhibition and task switching in attention-deficit/hyperactivity disorder. *J Am Acad Child Adolesc Psychiatry* 2004;43:1430-1440.
60. Bush G, Frazier JA, Rauch SL, Seidman LJ, Whalen PJ, Jenike MA, Rosen BR, Biederman J. Anterior cingulate cortex dysfunction in attention-deficit/hyperactivity disorder revealed by fMRI and the Counting Stroop. *Biol Psychiatry* 1999;45:1542-1552.
61. Schulz KP, Fan J, Tang CY, Newcorn JH, Buchsbaum MS, Cheung AM, Halperin JM. Response inhibition in adolescents diagnosed with attention deficit hyperactivity disorder during childhood: an event-related fMRI study. *Am J Psychiatry* 2004;161:1650-1657.
62. Ernst M, Kimes AS, London ED, Matochik JA, Eldreth D, Tata S, Contoreggi C, Leff M, Bolla K. Neural substrates of decision making in adults with attention deficit hyperactivity disorder. *Am J Psychiatry* 2003;160:1061-1070.
63. Schweitzer JB, Faber TL, Grafton ST, Tune LE, Hoffman JM, Kilts CD. Alterations in the functional anatomy of working memory in adult attention deficit hyperactivity disorder. *Am J Psychiatry* 2000;157:278-280.
64. Schweitzer JB, Lee DO, Hanford RB, Zink CF, Ely TD, Tagamets MA, Hoffman JM, Grafton ST, Kilts CD. Effect of methylphenidate on executive functioning in adults with attention-deficit/hyperactivity disorder: normalization of behavior but not related brain activity. *Biol Psychiatry* 2004;56:597-606.
65. Banich MT, Burgess GC, Depue BE, Ruzic L, Bidwell LC, Hitt-Laustsen S, Du YP, Willcutt EG. The neural basis of sustained and transient attentional control in young adults with ADHD. *Neuropsychologia* 2009;47:3095-3104.
66. Bayerl M, Dielentheis TF, Vucurevic G, Gesierich T, Vogel F, Fehr C, Stoeter P, Huss M, Konrad A. Disturbed brain activation during a working memory task in drug-naive adult patients with ADHD. *Neuroreport* 2010;21:442-446.
67. Cubillo A, Halari R, Ecker C, Giampietro V, Taylor E, Rubia K. Reduced activation and inter-regional functional connectivity of fronto-striatal networks in adults with childhood Attention-Deficit Hyperactivity Disorder (ADHD) and persisting symptoms during tasks of motor inhibition and cognitive switching. *J Psychiatr Res* 2010;44:629-639.
68. Dibbets P, Evers L, Hurks P, Marchetta N, Jolles J. Differences in feedback- and inhibition-related neural activity in adult ADHD. *Brain Cogn* 2009;70:73-83.
69. Dibbets P, Evers EA, Hurks PP, Bakker K, Jolles J. Differential brain activation patterns in adult attention-deficit hyperactivity disorder (ADHD) associated with task switching. *Neuropsychology* 2010;24:413-423.

70. Dillo W, Göke A, Prox-Vagedes V, Szycik GR, Roy M, Donnerstag F, Emrich HM, Ohlmeier MD. Neuronal correlates of ADHD in adults with evidence for compensation strategies-a functional MRI study with a Go/No-Go paradigm. *Ger Med Sci* 2010;8:Doc09.
71. Hale TS, Bookheimer S, McGough JJ, Phillips JM, McCracken JT. Atypical brain activation during simple & complex levels of processing in adult ADHD: an fMRI study. *J Atten Disord* 2007;11:125-140.
72. Karch S, Thalmeier T, Lutz J, Cerovecki A, Opgen-Rhein M, Hock B, Leicht G, Hennig-Fast K, Meindl T, Riedel M, Mulert C, Pogarell O. Neural correlates (ERP/fMRI) of voluntary selection in adult ADHD patients. *Eur Arch Psychiatry Clin Neurosci* 2010;260:427-440.
73. Kooistra L, van der Meere JJ, Edwards JD, Kaplan BJ, Crawford S, Goodyear BG. Preliminary fMRI findings on the effects of event rate in adults with ADHD. *J Neural Transm* 2010;117:655-662.
74. Ströhle A, Stoy M, Wrase J, Schwarzer S, Schlagenhaut F, Huss M, Hein J, Nedderhüt A, Neumann B, Gregor A, Juckel G, Knutson B, Lehmkuhl U, Bauer M, Heinz A. Reward anticipation and outcomes in adult males with attention-deficit/hyperactivity disorder. *Neuroimage* 2008;39:966-972.
75. Valera EM, Spencer RM, Zeffiro TA, Makris N, Spencer TJ, Faraone SV, Biederman J, Seidman LJ. Neural substrates of impaired sensorimotor timing in adult attention-deficit/hyperactivity disorder. *Biol Psychiatry* 2010;68:359-367.
76. Valera EM, Brown A, Biederman J, Faraone SV, Makris N, Monuteaux MC, Whitfield-Gabrieli S, Vitulano M, Schiller M, Seidman LJ. Sex differences in the functional neuroanatomy of working memory in adults with ADHD. *Am J Psychiatry* 2010;167:86-94.
77. Wolf RC, Plichta MM, Sambataro F, Fallgatter AJ, Jacob C, Lesch KP, Herrmann MJ, Schönfeldt-Lecuona C, Connemann BJ, Grön G, Vasic N. Regional brain activation changes and abnormal functional connectivity of the ventrolateral prefrontal cortex during working memory processing in adults with attention-deficit/hyperactivity disorder. *Hum Brain Mapp* 2009;30:2252-2266.
78. Cao Q, Zang Y, Zhu C, Cao X, Sun L, Zhou X, Wang Y. Alerting deficits in children with attention deficit/hyperactivity disorder: event-related fMRI evidence. *Brain Res* 2008;1219:159-168.
79. Cerullo M, Adler C, Lamy M, Eliassen J, Fleck D, Strakowski S, Del Bello MP. Differential brain activation during response inhibition in bipolar and attention-deficit hyperactivity disorders. *Early Intervention in Psychiatry* 2009;3:189-197.
80. Durston S, Davidson MC, Mulder MJ, Spicer JA, Galvan A, Tottenham N, Scheres A, Castellanos FX, van Engeland H, Casey BJ. Neural and behavioral correlates of expectancy violations in attention-deficit hyperactivity disorder. *J Child Psychol Psychiatry* 2007;48:881-889.

81. Kobel M, Bechtel N, Weber P, Specht K, Klarhöfer M, Scheffler K, Opwis K, Penner IK. Effects of methylphenidate on working memory functioning in children with attention deficit/hyperactivity disorder. *Eur J Paediatr Neurol* 2009;13:516-523.
82. Kobel M, Bechtel N, Specht K, Klarhöfer M, Weber P, Scheffler K, Opwis K, Penner IK. Structural and functional imaging approaches in attention deficit/hyperactivity disorder: does the temporal lobe play a key role? *Psychiatry Res* 2010;183:230-236.
83. Konrad K, Neufang S, Hanisch C, Fink GR, Herpertz-Dahlmann B. Dysfunctional attentional networks in children with attention deficit/hyperactivity disorder: evidence from an event-related functional magnetic resonance imaging study. *Biol Psychiatry* 2006;59:643-651.
84. Krauel K, Duzel E, Hinrichs H, Santel S, Rellum T, Baving L. Impact of emotional salience on episodic memory in attention-deficit/hyperactivity disorder: a functional magnetic resonance imaging study. *Biol Psychiatry* 2007;61:1370-1379.
85. Mostofsky SH, Rimrodt SL, Schafer JG, Boyce A, Goldberg MC, Pekar JJ, Denckla MB. Atypical motor and sensory cortex activation in attention-deficit/hyperactivity disorder: a functional magnetic resonance imaging study of simple sequential finger tapping. *Biol Psychiatry* 2006;59:48-56.
86. Passarotti AM, Sweeney JA, Pavuluri MN. Differential engagement of cognitive and affective neural systems in pediatric bipolar disorder and attention deficit hyperactivity disorder. *J Int Neuropsychol Soc* 2010;16:106-117.
87. Passarotti AM, Sweeney JA, Pavuluri MN. Emotion processing influences working memory circuits in pediatric bipolar disorder and attention-deficit/hyperactivity disorder. *J Am Acad Child Adolesc Psychiatry* 2010;49:1064-1080.
88. Passarotti AM, Sweeney JA, Pavuluri MN. Neural correlates of response inhibition in pediatric bipolar disorder and attention deficit hyperactivity disorder. *Psychiatry Res* 2010;181:36-43.
89. Rubia K, Smith AB, Brammer MJ, Taylor E. Temporal lobe dysfunction in medication-naive boys with attention-deficit/hyperactivity disorder during attention allocation and its relation to response variability. *Biol Psychiatry* 2007;62:999-1006.
90. Rubia K, Halari R, Smith AB, Mohammed M, Scott S, Giampietro V, Taylor E, Brammer MJ. Dissociated functional brain abnormalities of inhibition in boys with pure conduct disorder and in boys with pure attention deficit hyperactivity disorder. *Am J Psychiatry* 2008;165:889-897.
91. Rubia K, Smith AB, Halari R, Matsukura F, Mohammad M, Taylor E, Brammer MJ. Disorder-specific dissociation of orbitofrontal dysfunction in boys with pure conduct disorder during reward and ventrolateral prefrontal dysfunction in boys with pure ADHD during sustained attention. *Am J Psychiatry* 2009;166:83-94.

92. Rubia K, Halari R, Smith AB, Mohammad M, Scott S, Brammer MJ. Shared and disorder-specific prefrontal abnormalities in boys with pure attention-deficit/hyperactivity disorder compared to boys with pure CD during interference inhibition and attention allocation. *J Child Psychol Psychiatry* 2009;50:669-678.
93. Rubia K, Halari R, Cubillo A, Mohammad AM, Brammer M, Taylor E. Methylphenidate normalises activation and functional connectivity deficits in attention and motivation networks in medication-naïve children with ADHD during a rewarded continuous performance task. *Neuropharmacology* 2009;57:640-652.
94. Rubia K, Halari R, Cubillo A, Mohammad AM, Scott S, Brammer M. Disorder-specific inferior prefrontal hypofunction in boys with pure attention-deficit/hyperactivity disorder compared to boys with pure conduct disorder during cognitive flexibility. *Hum Brain Mapp* 2010;31:1823-1833.
95. Rubia K, Cubillo A, Smith AB, Woolley J, Heyman I, Brammer MJ. Disorder-specific dysfunction in right inferior prefrontal cortex during two inhibition tasks in boys with attention-deficit hyperactivity disorder compared to boys with obsessive-compulsive disorder. *Hum Brain Mapp* 2010;31:287-299.
96. Schulz KP, Newcorn JH, Fan J, Tang CY, Halperin JM. Brain activation gradients in ventrolateral prefrontal cortex related to persistence of ADHD in adolescent boys. *J Am Acad Child Adolesc Psychiatry* 2005;44:47-54.
97. Sheridan MA, Hinshaw S, D'Esposito M. Efficiency of the prefrontal cortex during working memory in attention-deficit/hyperactivity disorder. *J Am Acad Child Adolesc Psychiatry* 2007;46:1357-1366.
98. Silk T, Vance A, Rinehart N, Bradshaw J, Cunnington R. Dysfunction in the fronto-parietal network in attention deficit hyperactivity disorder (ADHD): An fMRI study. *Brain Imaging and Behavior* 2008; 2:123-131.
99. Smith AB, Taylor E, Brammer M, Halari R, Rubia K. Reduced activation in right lateral prefrontal cortex and anterior cingulate gyrus in medication-naïve adolescents with attention deficit hyperactivity disorder during time discrimination. *J Child Psychol Psychiatry* 2008;49:977-985.
100. Vance A, Silk TJ, Casey M, Rinehart NJ, Bradshaw JL, Bellgrove MA, Cunnington R. Right parietal dysfunction in children with attention deficit hyperactivity disorder, combined type: a functional MRI study. *Mol Psychiatry* 2007;12:826-32.
101. Rubia K, Halari R, Christakou A, Taylor E. Impulsiveness as a timing disturbance: neurocognitive abnormalities in attention-deficit hyperactivity disorder during temporal processes and normalization with methylphenidate. *Philos Trans R Soc Lond B Biol Sci* 2009;364:1919-1931.



### **A3. PAPERS INCLUDED IN THE META-ANALYSIS**

1. Banich MT, Burgess GC, Depue BE, Ruzic L, Bidwell LC, Hitt-Laustsen S, Du YP, Willcutt EG. The neural basis of sustained and transient attentional control in young adults with ADHD. *Neuropsychologia* 2009;47:3095-3104.
2. Bayerl M, Dielentheis TF, Vucurevic G, Gesierich T, Vogel F, Fehr C, Stoeter P, Huss M, Konrad A. Disturbed brain activation during a working memory task in drug-naive adult patients with ADHD. *Neuroreport* 2010; 21:442-446.
3. Booth JR, Burman DD, Meyer JR, Lei Z, Trommer BL, Davenport ND, Li W, Parrish TB, Gitelman DR, Mesulam MM. Larger deficits in brain networks for response inhibition than for visual selective attention in attention deficit hyperactivity disorder (ADHD). *J Child Psychol Psychiatry* 2005;46:94-111.
4. Braet W, Johnson KA, Tobin CT, Acheson R, McDonnell C, Hawi Z, Barry E, Mulligan A, Gill M, Bellgrove MA, Robertson IH, Garavan H. fMRI activation during response inhibition and error processing: the role of the DAT1 gene in typically developing adolescents and those diagnosed with ADHD. *Neuropsychologia* 2011;49:1641-1650.
5. Cao Q, Zang Y, Zhu C, Cao X, Sun L, Zhou X, Wang Y. Alerting deficits in children with attention deficit/hyperactivity disorder: event-related fMRI evidence. *Brain Res* 2008;1219:159-168.
6. Cerullo M, Adler C, Lamy M, Eliassen J, Fleck D, Strakowski S, Del Bello MP. Differential brain activation during response inhibition in bipolar and attention-deficit hyperactivity disorders. *Early Interv Psychiatry* 2009;3: 189-197.
7. Cubillo A, Halari R, Ecker C, Giampietro V, Taylor E, Rubia K. Reduced activation and inter-regional functional connectivity of fronto-striatal networks in adults with childhood Attention-Deficit Hyperactivity Disorder (ADHD) and persisting symptoms during tasks of motor inhibition and cognitive switching. *J Psychiatr Res* 2010;44:629-639.
8. Cubillo A, Halari R, Giampietro V, Taylor E, Rubia K. Fronto-striatal underactivation during interference inhibition and attention allocation in grown up children with attention deficit/hyperactivity disorder and persistent symptoms. *Psychiatry Res* 2011;193:17-27.
9. Cubillo A, Halari R, Smith A, Taylor E, Rubia K. A review of fronto-striatal and fronto-cortical brain abnormalities in children and adults with Attention Deficit Hyperactivity Disorder (ADHD) and new evidence for dysfunction in adults with ADHD during motivation and attention. *Cortex* 2012; 48:194-215.
10. Dibbets P, Evers L, Hurks P, Marchetta N, Jolles J. Differences in feedback- and inhibition-related neural activity in adult ADHD. *Brain Cogn* 2009;70:73-83.

11. Dibbets P, Evers EA, Hurks PP, Bakker K, Jolles J. Differential brain activation patterns in adult attention-deficit hyperactivity disorder (ADHD) associated with task switching. *Neuropsychology* 2010;24:413-423.
12. Dillo W, Göke A, Prox-Vagedes V, Szycik GR, Roy M, Donnerstag F, Emrich HM, Ohlmeier MD. Neuronal correlates of ADHD in adults with evidence for compensation strategies-a functional MRI study with a Go/No-Go paradigm. *Ger Med Sci* 2010;8:1-8.
13. Durston S, Tottenham NT, Thomas KM, Davidson MC, Eigsti IM, Yang Y, Ulug AM, Casey BJ. Differential patterns of striatal activation in young children with and without ADHD. *Biol Psychiatry* 2003;53:871-878.
14. Durston S, Davidson MC, Mulder MJ, Spicer JA, Galvan A, Tottenham N, Scheres A, Castellanos FX, van Engeland H, Casey BJ. Neural and behavioral correlates of expectancy violations in attention-deficit hyperactivity disorder. *J Child Psychol Psychiatry* 2007;48:881-889.
15. Hale TS, Bookheimer S, McGough JJ, Phillips JM, McCracken JT. Atypical brain activation during simple & complex levels of processing in adult ADHD: an fMRI study. *J Atten Disord* 2007;11:125-140.
16. Karch S, Thalmeier T, Lutz J, Cerovecki A, Opgen-Rhein M, Hock B, Leicht G, Hennig-Fast K, Meindl T, Riedel M, Mulert C, Pogarell O. Neural correlates (ERP/fMRI) of voluntary selection in adult ADHD patients. *Eur Arch Psychiatry Clin Neurosci* 2010;260:427-440.
17. Kobel M, Bechtel N, Weber P, Specht K, Klarhöfer M, Scheffler K, Opwis K, Penner IK. Effects of methylphenidate on working memory functioning in children with attention deficit/hyperactivity disorder. *Eur J Paediatr Neurol* 2009;13:516-523.
18. Kobel M, Bechtel N, Specht K, Klarhöfer M, Weber P, Scheffler K, Opwis K, Penner IK. Structural and functional imaging approaches in attention deficit/hyperactivity disorder: does the temporal lobe play a key role? *Psychiatry Res* 2010;183:230-236.
19. Konrad K, Neufang S, Hanisch C, Fink GR, Herpertz-Dahlmann B. Dysfunctional attentional networks in children with attention deficit/hyperactivity disorder: evidence from an event-related functional magnetic resonance imaging study. *Biol Psychiatry* 2006;59:643-651.
20. Kooistra L, van der Meere JJ, Edwards JD, Kaplan BJ, Crawford S, Goodyear BG. Preliminary fMRI findings on the effects of event rate in adults with ADHD. *J Neural Transm* 2010;117:655-662.
21. Krauel K, Duzel E, Hinrichs H, Santel S, Rellum T, Baving L. Impact of emotional salience on episodic memory in attention-deficit/hyperactivity disorder: a functional magnetic resonance imaging study. *Biol Psychiatry* 2007;61:1370-1379.
22. Mostofsky SH, Rimrodt SL, Schafer JG, Boyce A, Goldberg MC, Pekar JJ, Denckla MB. Atypical motor and sensory cortex activation in attention-deficit/hyperactivity disorder: a

functional magnetic resonance imaging study of simple sequential finger tapping. *Biol Psychiatry* 2006;59:48-56.

23. Passarotti AM, Sweeney JA, Pavuluri MN. Differential engagement of cognitive and affective neural systems in pediatric bipolar disorder and attention deficit hyperactivity disorder. *J Int Neuropsychol Soc* 2010;16:106-117.

24. Passarotti AM, Sweeney JA, Pavuluri MN. Emotion processing influences working memory circuits in pediatric bipolar disorder and attention-deficit/hyperactivity disorder. *J Am Acad Child Adolesc Psychiatry* 2010;49:1064-1080.

25. Passarotti AM, Sweeney JA, Pavuluri MN. Neural correlates of response inhibition in pediatric bipolar disorder and attention deficit hyperactivity disorder. *Psychiatry Res* 2010;181:36-43.

26. Prehn-Kristensen A, Krauel K, Hinrichs H, Fischer J, Malecki U, Schuetze H, Wolff S, Jansen O, Duzel E, Baving L. Methylphenidate does not improve interference control during a working memory task in young patients with attention-deficit hyperactivity disorder. *Brain Res* 2011;1388:56-68.

27. Rubia K, Overmeyer S, Taylor E, Brammer M, Williams SC, Simmons A, Bullmore ET. Hypofrontality in attention deficit hyperactivity disorder during higher-order motor control: a study with functional MRI. *Am J Psychiatry* 1999;156:891-896.

28. Rubia K, Smith AB, Brammer MJ, Toone B, Taylor E. Abnormal brain activation during inhibition and error detection in medication-naïve adolescents with ADHD. *Am J Psychiatry* 2005;162:1067-1075.

29. Rubia K, Smith AB, Brammer MJ, Taylor E. Temporal lobe dysfunction in medication-naïve boys with attention-deficit/hyperactivity disorder during attention allocation and its relation to response variability. *Biol Psychiatry* 2007;62:999-1006.

30. Rubia K, Halari R, Smith AB, Mohammed M, Scott S, Giampietro V, Taylor E, Brammer MJ. Dissociated functional brain abnormalities of inhibition in boys with pure conduct disorder and in boys with pure attention deficit hyperactivity disorder. *Am J Psychiatry* 2008;165:889-897.

31. Rubia K, Smith AB, Halari R, Matsukura F, Mohammad M, Taylor E, Brammer MJ. Disorder-specific dissociation of orbitofrontal dysfunction in boys with pure conduct disorder during reward and ventrolateral prefrontal dysfunction in boys with pure ADHD during sustained attention. *Am J Psychiatry* 2009;166:83-94.

32. Rubia K, Halari R, Smith AB, Mohammad M, Scott S, Brammer MJ. Shared and disorder-specific prefrontal abnormalities in boys with pure attention-deficit/hyperactivity disorder compared to boys with pure CD during interference inhibition and attention allocation. *J Child Psychol Psychiatry* 2009;50:669-678.

33. Rubia K, Halari R, Cubillo A, Mohammad AM, Brammer M, Taylor E. Methylphenidate normalises activation and functional connectivity deficits in attention and motivation networks in medication-naïve children with ADHD during a rewarded continuous performance task. *Neuropharmacology* 2009;57:640-652.
34. Rubia K, Halari R, Christakou A, Taylor E. Impulsiveness as a timing disturbance: neurocognitive abnormalities in attention-deficit hyperactivity disorder during temporal processes and normalization with methylphenidate. *Philos Trans R Soc Lond B Biol Sci* 2009;364:1919-1931.
35. Rubia K, Halari R, Cubillo A, Mohammad AM, Scott S, Brammer M. Disorder-specific inferior prefrontal hypofunction in boys with pure attention-deficit/hyperactivity disorder compared to boys with pure conduct disorder during cognitive flexibility. *Hum Brain Mapp* 2010;31:1823-1833.
36. Rubia K, Cubillo A, Smith AB, Woolley J, Heyman I, Brammer MJ. Disorder-specific dysfunction in right inferior prefrontal cortex during two inhibition tasks in boys with attention-deficit hyperactivity disorder compared to boys with obsessive-compulsive disorder. *Hum Brain Mapp* 2010;31:287-299.
37. Rubia K, Halari R, Mohammad AM, Taylor E, Brammer M. Methylphenidate normalizes frontocingulate underactivation during error processing in attention-deficit/hyperactivity disorder. *Biol Psychiatry* 2011;70:255-262.
38. Rubia K, Halari R, Cubillo A, Smith AB, Mohammad AM, Brammer M, Taylor E. Methylphenidate normalizes fronto-striatal underactivation during interference inhibition in medication-naïve boys with attention-deficit hyperactivity disorder. *Neuropsychopharmacology* 2011;36:1575-1586.
39. Rubia K, Cubillo A, Woolley J, Brammer MJ, Smith A. Disorder-specific dysfunctions in patients with attention-deficit/hyperactivity disorder compared to patients with obsessive-compulsive disorder during interference inhibition and attention allocation. *Hum Brain Mapp* 2011;32:601-611.
40. Schulz KP, Newcorn JH, Fan J, Tang CY, Halperin JM. Brain activation gradients in ventrolateral prefrontal cortex related to persistence of ADHD in adolescent boys. *J Am Acad Child Adolesc Psychiatry* 2005;44:47-54.
41. Sheridan MA, Hinshaw S, D'Esposito M. Efficiency of the prefrontal cortex during working memory in attention-deficit/hyperactivity disorder. *J Am Acad Child Adolesc Psychiatry* 2007;46:1357-1366.
42. Silk T, Vance A, Rinehart N, Bradshaw J, Cunnington R. Dysfunction in the fronto-parietal network in attention deficit hyperactivity disorder (ADHD): An fMRI study. *Brain Imag Behav* 2008;2:123-131.

43. Silk T, Vance A, Rinehart N, Egan G, O'Boyle M, Bradshaw JL, Cunnington R. Fronto-parietal activation in attention-deficit hyperactivity disorder, combined type: functional magnetic resonance imaging study. *Br J Psychiatry* 2005;187:282-283.
44. Smith AB, Taylor E, Brammer M, Toone B, Rubia K. Task-specific hypoactivation in prefrontal and temporoparietal brain regions during motor inhibition and task switching in medication-naïve children and adolescents with attention deficit hyperactivity disorder. *Am J Psychiatry* 2006;163:1044-1051.
45. Smith AB, Taylor E, Brammer M, Halari R, Rubia K. Reduced activation in right lateral prefrontal cortex and anterior cingulate gyrus in medication-naïve adolescents with attention deficit hyperactivity disorder during time discrimination. *J Child Psychol Psychiatry* 2008;49:977-985.
46. Spinelli S, Joel S, Nelson TE, Vasa RA, Pekar JJ, Mostofsky SH. Different neural patterns are associated with trials preceding inhibitory errors in children with and without attention-deficit/hyperactivity disorder. *J Am Acad Child Adolesc Psychiatry* 2011;50:705-715.
47. Spinelli S, Vasa RA, Joel S, Nelson TE, Pekar JJ, Mostofsky SH. Variability in post-error behavioral adjustment is associated with functional abnormalities in the temporal cortex in children with ADHD. *J Child Psychol Psychiatry* 2011;52:808-816.
48. Ströhle A, Stoy M, Wrase J, Schwarzer S, Schlagenhauf F, Huss M, Hein J, Nedderhüt A, Neumann B, Gregor A, Juckel G, Knutson B, Lehmkuhl U, Bauer M, Heinz A. Reward anticipation and outcomes in adult males with attention-deficit/hyperactivity disorder. *Neuroimage* 2008;39:966-972.
49. Tamm L, Menon V, Ringel J, Reiss AL. Event-related fMRI evidence of frontotemporal involvement in aberrant response inhibition and task switching in attention-deficit/hyperactivity disorder. *J Am Acad Child Adolesc Psychiatry* 2004;43:1430-1440.
50. Tamm L, Menon V, Reiss AL. Parietal attentional system aberrations during target detection in adolescents with attention deficit hyperactivity disorder: event-related fMRI evidence. *Am J Psychiatry* 2006;163:1033-1043.
51. Valera EM, Faraone SV, Biederman J, Poldrack RA, Seidman LJ. Functional neuroanatomy of working memory in adults with attention-deficit/hyperactivity disorder. *Biol Psychiatry* 2005;57:439-447.
52. Valera EM, Spencer RM, Zeffiro TA, Makris N, Spencer TJ, Faraone SV, Biederman J, Seidman LJ. Neural substrates of impaired sensorimotor timing in adult attention-deficit/hyperactivity disorder. *Biol Psychiatry* 2010;68:359-367.
53. Valera EM, Brown A, Biederman J, Faraone SV, Makris N, Monuteaux MC, Whitfield-Gabrieli S, Vitulano M, Schiller M, Seidman LJ. Sex differences in the functional neuroanatomy of working memory in adults with ADHD. *Am J Psychiatry* 2010;167:86-94.

54. Vance A, Silk TJ, Casey M, Rinehart NJ, Bradshaw JL, Bellgrove MA, Cunnington R. Right parietal dysfunction in children with attention deficit hyperactivity disorder, combined type: a functional MRI study. *Mol Psychiatry* 2007;12:826-32.

55. Wolf RC, Plichta MM, Sambataro F, Fallgatter AJ, Jacob C, Lesch KP, Herrmann MJ, Schönfeldt-Lecuona C, Connemann BJ, Grön G, Vasic N. Regional brain activation changes and abnormal functional connectivity of the ventrolateral prefrontal cortex during working memory processing in adults with attention-deficit/hyperactivity disorder. *Hum Brain Mapp* 2009;30:2252-2266.

## SUPPLEMENTAL TABLES AND FIGURES

**Table S1. Regions exhibiting significantly greater activation in comparisons relative to individuals with ADHD and vice-versa in the meta-analyses restricted to specific tasks or clinical characteristics. Brodmann areas (BA) are indicated in parenthesis when identifiable. When located unambiguously in a cortical region, the anatomic label is followed in parenthesis, in italics, by the neural network corresponding to the maximum activation likelihood estimation value, from the seven reference neuronal networks identified by Yeo et al. (9).**

| Cluster #                                                                               | Volume (mm <sup>3</sup> ) | Weighted Center* |        |       | Extrema Value | Maximum ALE value* |     |    | Anatomical Label                                                                                              |
|-----------------------------------------------------------------------------------------|---------------------------|------------------|--------|-------|---------------|--------------------|-----|----|---------------------------------------------------------------------------------------------------------------|
|                                                                                         |                           | x                | y      | z     |               | x                  | y   | z  |                                                                                                               |
| <b><u>Comparisons &gt; Participants with ADHD</u></b>                                   |                           |                  |        |       |               |                    |     |    |                                                                                                               |
| <b>Stimulant naïve participants, all tasks</b>                                          |                           |                  |        |       |               |                    |     |    |                                                                                                               |
| <i>Number of foci= 149; Number of experiments= 20; Total number of subjects= 593 **</i> |                           |                  |        |       |               |                    |     |    |                                                                                                               |
| 1                                                                                       | 1648                      | 3.23             | 17.17  | 52.61 | 0.0143        | 0                  | 16  | 54 | Medial Superior Frontal Gyrus/Supplementary Motor Area (BA6) R, L ( <i>Frontoparietal/Ventral Attention</i> ) |
|                                                                                         |                           |                  |        |       | 0.0111        | 12                 | 22  | 56 | Superior Frontal Gyrus (BA 6) R                                                                               |
| 2                                                                                       | 664                       | 32.71            | 0.59   | 2.61  | 0.0132        | 32                 | 2   | 4  | Putamen R                                                                                                     |
| 3                                                                                       | 560                       | 8.9              | -15.81 | -2.77 | 0.0116        | 8                  | -16 | -2 | Thalamus R                                                                                                    |
| 4                                                                                       | 504                       | -29.04           | 58.98  | -0.49 | 0.0098        | -32                | 56  | -8 | Middle Frontal Gyrus (BA 10) L ( <i>Frontoparietal/Default</i> )                                              |
|                                                                                         |                           |                  |        |       | 0.0093        | -26                | 64  | 8  | Superior Frontal Gyrus (BA 10) L ( <i>Ventral Attention/Default</i> )                                         |
|                                                                                         |                           |                  |        |       | 0.0092        | -28                | 60  | 2  | Middle Frontal Gyrus (BA 10) L ( <i>Frontoparietal/Default</i> )                                              |
| 5                                                                                       | 400                       | 56.07            | 12.66  | -6.85 | 0.0131        | 56                 | 12  | -6 | Superior Temporal Gyrus (BA 22) R ( <i>Somatomotor</i> )                                                      |
| 6                                                                                       | 392                       | -18.38           | 7.79   | -7.36 | 0.0101        | -18                | 8   | -6 | Putamen L                                                                                                     |
| 7                                                                                       | 392                       | -17.98           | -2.78  | 61.2  | 0.0132        | -18                | -2  | 62 | Middle Frontal Gyrus (BA 6-8) L ( <i>Dorsal Attention</i> )                                                   |
| 8                                                                                       | 352                       | 43.38            | 9      | 30    | 0.0123        | 44                 | 8   | 30 | Inferior Frontal Sulcus; Inferior Precentral Sulcus R ( <i>Dorsal Attention/Frontoparietal</i> )              |

|    |     |       |        |       |        |    |     |    |                                                                                |
|----|-----|-------|--------|-------|--------|----|-----|----|--------------------------------------------------------------------------------|
| 9  | 272 | 13.94 | -45.7  | 26.65 | 0.0103 | 14 | -46 | 26 | Posterior Cingulate Cortex; Subparietal Sulcus R                               |
| 10 | 256 | 33.43 | -26.31 | 48.46 | 0.0101 | 34 | -26 | 48 | Postcentral Gyrus R ( <i>Somatomotor</i> )                                     |
| 11 | 232 | 2.3   | 47.39  | 15.64 | 0.0095 | 4  | 48  | 16 | Medial Frontal Gyrus; Paracingulate Sulcus (BA 10; BA 32) R ( <i>Default</i> ) |

**Participants without comorbidities, all tasks**

*Number of foci= 203; Number of experiments= 27; Total number of subjects= 791 \*\**

|    |      |        |        |       |        |     |     |    |                                                                                                                |
|----|------|--------|--------|-------|--------|-----|-----|----|----------------------------------------------------------------------------------------------------------------|
| 1  | 1896 | 1.28   | 16.35  | 52.44 | 0.0208 | 0   | 16  | 54 | Medial Superior Frontal Gyrus, BA 6; Supplementary Motor Area R, L ( <i>Frontoparietal/Ventral Attention</i> ) |
|    |      |        |        |       | 0.0111 | 12  | 22  | 56 | Superior Frontal Gyrus (BA 6) R                                                                                |
| 2  | 608  | 33.68  | -27.29 | 50.65 | 0.0137 | 34  | -28 | 52 | Postcentral Gyrus R ( <i>Somatomotor</i> )                                                                     |
| 3  | 496  | -28.03 | 59.69  | 0.87  | 0.0099 | -28 | 60  | 2  | Middle Frontal Gyrus (BA 10) L ( <i>Frontoparietal</i> )                                                       |
|    |      |        |        |       | 0.0098 | -32 | 56  | -8 | Middle Frontal Gyrus (BA 10) L ( <i>Default/Frontoparietal</i> )                                               |
| 4  | 472  | 30.15  | -0.44  | 4.78  | 0.0121 | 30  | 0   | 6  | Putamen R                                                                                                      |
| 5  | 384  | 19.42  | -91.75 | 8.07  | 0.0114 | 20  | -92 | 8  | Occipital Pole R                                                                                               |
| 6  | 344  | 55.94  | 12.9   | -5    | 0.0131 | 56  | 12  | -6 | Superior Temporal Gyrus (BA 22) R ( <i>Somatomotor</i> )                                                       |
| 7  | 336  | 40.62  | 10.85  | 6.6   | 0.0133 | 40  | 10  | 6  | Inferior Frontal Gyrus (Frontal Operculum) R ( <i>Ventral Attention</i> )                                      |
| 8  | 320  | -40.52 | 19.27  | -3.34 | 0.0104 | -40 | 18  | -2 | Inferior Frontal Gyrus (Orbital Part); Anterior Insula L ( <i>Frontoparietal</i> )                             |
| 9  | 304  | -18.94 | 7.69   | -7.77 | 0.0111 | -18 | 8   | -6 | Putamen L                                                                                                      |
| 10 | 272  | 43.53  | 9.00   | 30.00 | 0.0123 | 44  | 8   | 30 | Inferior Frontal Sulcus; Inferior Precentral Sulcus R ( <i>Dorsal Attention/Frontoparietal</i> )               |
| 11 | 232  | 3.91   | 48.57  | 15.79 | 0.0102 | 4   | 48  | 16 | Medial Frontal Gyrus; Paracingulate Sulcus (BA 10; BA 32) R ( <i>Default</i> )                                 |
| 12 | 200  | 46.96  | 25.92  | 33.13 | 0.0111 | 46  | 26  | 34 | Middle Frontal Gyrus (BA 9/46) R ( <i>Frontoparietal</i> )                                                     |

**All participants, inhibition tasks**

*Number of foci= 125; Number of experiments= 21; Total number of subjects= 566 \*\**



|   |      |        |        |       |        |     |     |    |                                                                                                               |
|---|------|--------|--------|-------|--------|-----|-----|----|---------------------------------------------------------------------------------------------------------------|
| 1 | 1264 | -0.23  | 15.53  | 53.54 | 0.0204 | 0   | 16  | 54 | Medial Superior Frontal Gyrus/Supplementary Motor Area (BA6) R, L ( <i>Frontoparietal/Ventral Attention</i> ) |
|   |      |        |        |       | 0.0091 | 0   | 14  | 44 | Paracingulate Gyrus (BA 32) R, L ( <i>Ventral Attention</i> )                                                 |
| 2 | 528  | 55.8   | 12.36  | -6.54 | 0.0136 | 56  | 12  | -6 | Superior Temporal Gyrus (BA 22) R ( <i>Somatomotor</i> )                                                      |
| 3 | 400  | 7.38   | -16.2  | -0.96 | 0.0112 | 8   | -16 | -2 | Thalamus R                                                                                                    |
| 4 | 296  | 42.71  | 14.54  | 9.2   | 0.0091 | 44  | 18  | 12 | Inferior Frontal Gyrus (Frontal Operculum) R                                                                  |
|   |      |        |        |       | 0.0091 | 42  | 12  | 8  | Inferior Frontal Gyrus (Frontal Operculum) R ( <i>Ventral Attention</i> )                                     |
| 5 | 280  | 51.27  | 25.43  | 21.95 | 0.0093 | 54  | 26  | 18 | Inferior Frontal Gyrus (BA 44/45) R ( <i>Frontoparietal</i> )                                                 |
|   |      |        |        |       | 0.0087 | 48  | 24  | 28 | Middle Frontal Gyrus (BA 9/46) R ( <i>Frontoparietal</i> )                                                    |
| 6 | 272  | -26.34 | 62.03  | 6     | 0.0096 | -26 | 64  | 8  | Superior Frontal Gyrus (BA 10) L ( <i>Frontoparietal/Default</i> )                                            |
| 7 | 224  | -37.94 | 44.77  | 3.96  | 0.0099 | -38 | 44  | 4  | Inferior Frontal Gyrus/Inferior Frontal Sulcus (BA 45; BA 9/46) L ( <i>Frontoparietal</i> )                   |
| 8 | 216  | -41.43 | -73.6  | -4.45 | 0.0102 | -42 | -74 | -4 | Inferior Occipital Gyrus L ( <i>Visual</i> )                                                                  |
| 9 | 216  | -7.55  | -29.84 | -4.89 | 0.0094 | -8  | -30 | -6 | Midbrain; Superior Colliculus L                                                                               |

**All participants, working memory tasks**

*Number of foci= 48; Number of experiments= 8; Total number of subjects= 341 \*\**

|   |     |        |       |      |        |     |    |    |                                                                                            |
|---|-----|--------|-------|------|--------|-----|----|----|--------------------------------------------------------------------------------------------|
| 1 | 264 | -40.13 | 20.73 | -6.2 | 0.0083 | -40 | 20 | -8 | Inferior Frontal Gyrus (Orbital Part); Anterior Insula L ( <i>Default/Frontoparietal</i> ) |
| 2 | 256 | 33     | 57    | 15   | 0.0087 | 32  | 56 | 14 | Middle Frontal Gyrus (BA 10) R ( <i>Frontoparietal</i> )                                   |

**All participants, attention tasks**

*Number of foci= 49; Number of experiments= 11; Total number of subjects=363 \*\**

|   |     |      |       |       |        |   |    |    |                                                            |
|---|-----|------|-------|-------|--------|---|----|----|------------------------------------------------------------|
| 1 | 560 | 1.51 | 14.47 | 43.93 | 0.0142 | 2 | 14 | 44 | Paracingulate Gyrus (BA 32) R ( <i>Ventral Attention</i> ) |
|---|-----|------|-------|-------|--------|---|----|----|------------------------------------------------------------|

**Participants with ADHD > Comparisons**

**Stimulant naïve participants, all tasks**

*Number of foci= 40; Number of experiments= 9; Total number of subjects= 239 \*\**

|   |     |       |       |       |        |    |    |    |                                |
|---|-----|-------|-------|-------|--------|----|----|----|--------------------------------|
| 1 | 448 | 31.24 | -7.25 | 16.55 | 0.0107 | 32 | -8 | 16 | White Matter R (sub-operculum) |
|---|-----|-------|-------|-------|--------|----|----|----|--------------------------------|

**Participants without comorbidities, all tasks**

*Number of foci= 70; Number of experiments= 14; Total number of subjects= 388 \*\**

|   |      |        |        |       |        |     |     |    |                                                                     |
|---|------|--------|--------|-------|--------|-----|-----|----|---------------------------------------------------------------------|
| 1 | 1152 | 40.34  | -59.6  | 16.15 | 0.0155 | 40  | -58 | 18 | Angular gyrus; Middle Occipital Gyrus R                             |
| 2 | 608  | -39.02 | -27.45 | 6.5   | 0.011  | -40 | -24 | 6  | Heschl's Gyrus L ( <i>Somatomotor</i> )                             |
|   |      |        |        |       | 0.0099 | -40 | -32 | 8  | Heschl's Gyrus L ( <i>Somatomotor</i> )                             |
| 3 | 488  | 11.72  | -50.3  | 30.56 | 0.0099 | 14  | -50 | 30 | Posterior Cingulate Cortex; Subparietal Sulcus R ( <i>Default</i> ) |
|   |      |        |        |       | 0.0093 | 4   | -48 | 30 | Posterior Cingulate Cortex R ( <i>Default</i> )                     |
| 4 | 280  | -48.2  | 33.83  | -0.2  | 0.0101 | -48 | 34  | 0  | Inferior Frontal Gyrus (BA 45) ( <i>Default</i> )                   |

**All participants, inhibition tasks**

*Number of foci= 41; Number of experiments= 10; Total number of subjects= 247 \*\**

|   |     |       |        |       |        |    |     |    |                                                    |
|---|-----|-------|--------|-------|--------|----|-----|----|----------------------------------------------------|
| 1 | 568 | 39.75 | -57.25 | 19.21 | 0.0133 | 40 | -58 | 20 | Angular Gyrus/Middle Occipital Gyrus R             |
| 2 | 256 | 22.53 | 38.93  | 20.5  | 0.0084 | 24 | 36  | 20 | Intermediate Frontal Sulcus/Frontal White Matter R |

Footnote: \*Montreal Neurological Institute coordinates; \*\* After removing complete overlap but including partial overlap of participants across studies from the same research groups; \*\*\* R: Right; L: Left. ALE: Activation likelihood estimation.

**Table S2. Regions exhibiting significantly greater activation in comparisons relative to individuals with ADHD and vice-versa in the omnibus meta-analysis. Brodmann areas (BA) are indicated in parenthesis when identifiable. When located unambiguously in a cortical region, the anatomic label is followed in parenthesis, in italics, by the neural network corresponding to the maximum activation likelihood estimation value, from the seven reference neuronal networks identified by Yeo et al. (9).**

| Cluster #                                                                                | Volume (mm <sup>3</sup> ) | Weighted Center* |        |       | Extrema Value | Maximum ALE value* |     |    | Anatomical Label                                                                                                    |
|------------------------------------------------------------------------------------------|---------------------------|------------------|--------|-------|---------------|--------------------|-----|----|---------------------------------------------------------------------------------------------------------------------|
|                                                                                          |                           | x                | y      | z     |               | x                  | y   | z  |                                                                                                                     |
| <b>Comparisons &gt; Participants with ADHD, All (i.e., children + adults), all tasks</b> |                           |                  |        |       |               |                    |     |    |                                                                                                                     |
| <i>Number of foci= 322; Number of experiments= 47; Total number of subjects= 1453 **</i> |                           |                  |        |       |               |                    |     |    |                                                                                                                     |
| 1                                                                                        | 1544                      | -0.29            | 15.48  | 49.21 | 0.0213        | 0                  | 16  | 54 | Medial Superior Frontal Gyrus /Supplementary Motor Area (BA 6) R, L *** ( <i>Frontoparietal/Ventral Attention</i> ) |
|                                                                                          |                           |                  |        |       | 0.0186        | 0                  | 14  | 44 | Paracingulate Gyrus (BA 32) R, L ( <i>Ventral Attention</i> )                                                       |
| 2                                                                                        | 688                       | -19.66           | 6.16   | -1.65 | 0.0122        | -20                | 4   | 4  | Putamen L                                                                                                           |
| 3                                                                                        | 656                       | -51.78           | 13.11  | 4.05  | 0.0160        | -48                | 12  | 6  | Inferior Frontal Gyrus (Pars Opercularis; BA 44) L ( <i>Ventral Attention</i> )                                     |
|                                                                                          |                           |                  |        |       | 0.0136        | -58                | 14  | 2  | Inferior Frontal Gyrus (Pars Opercularis; BA 44) L                                                                  |
| 4                                                                                        | 632                       | 19.61            | -28.16 | 60.43 | 0.0147        | 20                 | -28 | 62 | Central Sulcus/Postcentral Gyrus R ( <i>Somatomotor</i> )                                                           |
|                                                                                          |                           |                  |        |       | 0.0113        | 22                 | -28 | 52 | Central Sulcus/Precentral Gyrus R                                                                                   |
| 5                                                                                        | 624                       | 55.99            | -25.46 | 27.94 | 0.0177        | 56                 | -26 | 28 | Inferior Parietal Lobule/ Supramarginal Gyrus (BA 40) R ( <i>Ventral Attention</i> )                                |
| 6                                                                                        | 584                       | 30.96            | 0.63   | 3.33  | 0.0149        | 32                 | 0   | 4  | Putamen R                                                                                                           |
| 7                                                                                        | 392                       | 41.09            | 12.06  | 7.06  | 0.0143        | 40                 | 12  | 6  | Inferior Frontal Gyrus (Frontal Operculum) R ( <i>Ventral Attention</i> )                                           |
| 8                                                                                        | 376                       | -42.53           | 31.76  | 25.13 | 0.0147        | -42                | 32  | 24 | Middle Frontal Gyrus (BA 9/46) L ( <i>Frontoparietal</i> )                                                          |
| 9                                                                                        | 328                       | 33.5             | -27.31 | 50.85 | 0.0137        | 34                 | -28 | 52 | Postcentral Gyrus R ( <i>Somatomotor</i> )                                                                          |
| 10                                                                                       | 304                       | 42.91            | 32.5   | -3.12 | 0.0145        | 44                 | 32  | -4 | Inferior Frontal Gyrus (BA 47/12) R ( <i>Ventral Attention</i> )                                                    |
| 11                                                                                       | 224                       | 55.66            | 12.32  | -6.38 | 0.0136        | 56                 | 12  | -6 | Superior Temporal Gyrus (BA 22) R ( <i>Somatomotor</i> )                                                            |

|                                                                                         |      |        |        |       |        |     |     |     |                                                                                   |
|-----------------------------------------------------------------------------------------|------|--------|--------|-------|--------|-----|-----|-----|-----------------------------------------------------------------------------------|
| 12                                                                                      | 224  | 42.25  | 9.56   | 29.51 | 0.0134 | 42  | 10  | 30  | Inferior Frontal Sulcus/Inferior Precentral Sulcus R<br>( <i>Frontoparietal</i> ) |
| 13                                                                                      | 200  | 26.63  | -42.02 | 63.69 | 0.0129 | 26  | -42 | 64  | Posterior Parietal Lobule (BA 7) R ( <i>Somatomotor</i> )                         |
| <b>Participants with ADHD &gt; Comparisons, All (i.e., children +adults), all tasks</b> |      |        |        |       |        |     |     |     |                                                                                   |
| <i>Number of foci= 121; Number of experiments= 23; Total number of subjects= 589 **</i> |      |        |        |       |        |     |     |     |                                                                                   |
| 1                                                                                       | 1072 | 40.33  | -59.54 | 16.3  | 0.0155 | 40  | -58 | 18  | Angular Gyrus; Middle Occipital Gyrus R ***                                       |
| 2                                                                                       | 792  | -39.53 | -27.42 | 5.36  | 0.0116 | -40 | -24 | 6   | Heschl's Gyrus L ( <i>Somatomotor</i> )                                           |
|                                                                                         |      |        |        |       | 0.0103 | -40 | -32 | 6   | Heschl's Gyrus L ( <i>Somatomotor</i> )                                           |
| 3                                                                                       | 696  | 11.61  | -49.75 | 29.61 | 0.0106 | 14  | -50 | 30  | Posterior Cingulate Cortex; Subparietal Sulcus<br>( <i>Default</i> )              |
|                                                                                         |      |        |        |       | 0.0098 | 4   | -48 | 30  | Posterior Cingulate Cortex R ( <i>Default</i> )                                   |
| 4                                                                                       | 656  | 3.57   | -14.81 | 41.47 | 0.0134 | 4   | -14 | 42  | Midcingulate Cortex R ( <i>Ventral Attention</i> )                                |
| 5                                                                                       | 472  | 22.19  | 43.41  | 19.24 | 0.0111 | 22  | 44  | 20  | Intermediate Frontal Sulcus R                                                     |
|                                                                                         |      |        |        |       | 0.0087 | 24  | 36  | 20  | Intermediate Frontal Sulcus; Right Frontal White<br>Matter R                      |
| 6                                                                                       | 352  | -49.15 | 34.43  | -1.54 | 0.0102 | -48 | 34  | 0   | Inferior Frontal Gyrus (BA 45) L ( <i>Default</i> )                               |
|                                                                                         |      |        |        |       | 0.0078 | -54 | 36  | -10 | Inferior Frontal Gyrus (BA 45; 47/12) L                                           |
| 7                                                                                       | 312  | 31.1   | -7.19  | 16.89 | 0.0107 | 32  | -8  | 16  | White Matter R (sub-operculum)                                                    |

Footnote: \*Montreal Neurological Institute coordinates; \*\*After removing complete overlap but including partial overlap of participants across studies from the same research groups; \*\*\* R: Right; L: Left. ALE: Activation likelihood estimation.

**Table S3. Subtraction analyses (p uncorrected 0.05) for the contrasts Comparisons > ADHD and ADHD > Comparisons. Brodmann areas (BA) are indicated in parenthesis when identifiable. When located unambiguously in a cortical region, the anatomic label is followed in parenthesis, in italics, by the neural network corresponding to the maximum activation likelihood estimation value, from the seven reference neuronal networks identified by Yeo et al. (9).**

| Cluster #                                       | Volume (mm <sup>3</sup> ) | Weighted Center* |      |      | Extrema Value | Maximum ALE value* |      |       | Anatomical Label                                                        |
|-------------------------------------------------|---------------------------|------------------|------|------|---------------|--------------------|------|-------|-------------------------------------------------------------------------|
|                                                 |                           | x                | y    | z    |               | x                  | y    | z     |                                                                         |
| <b>Comparisons&gt;ADHD, all tasks</b>           |                           |                  |      |      |               |                    |      |       |                                                                         |
| <b>Adults minus children</b>                    |                           |                  |      |      |               |                    |      |       |                                                                         |
| 1                                               | 304                       | -47.8            | 7.77 | 52.9 | 2.6520698     | -46                | 6.67 | 55.33 | Middle Frontal Gyrus (BA6) L ( <i>Default</i> )                         |
| <b>Children minus adults</b>                    |                           |                  |      |      |               |                    |      |       |                                                                         |
| 1                                               | 768                       | -0.24            | 15.7 | 42.9 | 1.8867052     | -6                 | 19.3 | 40.67 | Dorsal Anterior Cingulate Cortex (BA 32) L ( <i>Ventral Attention</i> ) |
|                                                 |                           |                  |      |      | 1.741477      | 0                  | 18   | 46    | Dorsal Anterior Cingulate Cortex (BA 32) R L ( <i>Frontoparietal</i> )  |
| 2                                               | 320                       | 41.6             | 10.3 | 29.2 | 2.0374997     | 42                 | 12   | 30    | Middle Frontal Gyrus R ( <i>Frontoparietal</i> )                        |
| 3                                               | 296                       | 47.41            | 25.8 | 31.4 | 2.5240846     | 48                 | 24   | 26    | Middle Frontal Gyrus R ( <i>Frontoparietal</i> )                        |
| 4                                               | 216                       | 55.38            | 13.9 | -7.4 | 2.0179162     | 58                 | 16   | -6    | Superior Temporal Gyrus (BA 22) R                                       |
| <b>Comorbid minus non-comorbid participants</b> |                           |                  |      |      |               |                    |      |       |                                                                         |
| 1                                               | 200                       | 24.14            | 26.7 | 31.2 | 2.180776      | 24                 | 26   | 32    | Middle Frontal Gyrus R                                                  |
| <b>Non-comorbid minus comorbid participants</b> |                           |                  |      |      |               |                    |      |       |                                                                         |
| 1                                               | 280                       | 3.87             | 48.4 | 16   | 2.3824043     | 1.5                | 46   | 15.75 | Perigenual Anterior Cingulate Cortex (BA 24) R                          |
| 2                                               | 232                       | 34.71            | -28  | 48.6 | 1.9565533     | 34.67              | -26  | 46    | Postcentral Gyrus R                                                     |
| <b>Stimulant-naïve minus stimulant-treated</b>  |                           |                  |      |      |               |                    |      |       |                                                                         |
| 1                                               | 440                       | 9.15             | -16  | -4.3 | 1.6706036     | 12                 | -14  | 0     | Thalamus R                                                              |
| 2                                               | 376                       | 10.63            | 21.3 | 56.3 | 1.8521799     | 9.67               | 23.3 | 58.33 | Superior Frontal Gyrus (BA 6) R                                         |
| 3                                               | 200                       | 13.76            | -45  | 26.1 | 2.3115952     | 14                 | -44  | 22    | White matter                                                            |
| <b>Stimulant-treated minus stimulant-naïve</b>  |                           |                  |      |      |               |                    |      |       |                                                                         |
| 1                                               | 288                       | 42.52            | 16.1 | 9.55 | 2.2029254     | 43                 | 22   | 12    | Sub-lobar insula R                                                      |
| <b>ADHD&gt;Comparisons, all tasks</b>           |                           |                  |      |      |               |                    |      |       |                                                                         |

| <b>Comorbid minus non-comorbid</b>             |     |       |      |      |           |       |      |       |                          |
|------------------------------------------------|-----|-------|------|------|-----------|-------|------|-------|--------------------------|
| 1                                              | 296 | 15.24 | -48  | 59.5 | 2.149434  | 15.17 | -48  | 59.5  | Superior parietal lobe R |
| <b>Stimulant-treated minus stimulant-naïve</b> |     |       |      |      |           |       |      |       |                          |
| 1                                              | 480 | 22.26 | 44.4 | 19.1 | 2.2262118 | 22.61 | 45.2 | 18.96 | Frontal pole R           |
| 2                                              | 200 | 13.99 | -49  | 26.1 | 1.8926833 | 13.6  | -49  | 25.4  | White matter             |

Footnote: \**Montreal Neurological Institute coordinates*; \*\**After removing complete overlap but including partial overlap of participants across studies from the same research groups*; \*\*\* *R: Right; L: Left*.

Figure S1. Regions exhibiting significantly greater activation in comparisons relative to individuals with ADHD (upper panel) and in individuals with ADHD relative to comparisons (lower panel). The figure reports results for the meta-analyses focused on individuals without psychiatric comorbidities or stimulant-naïve.

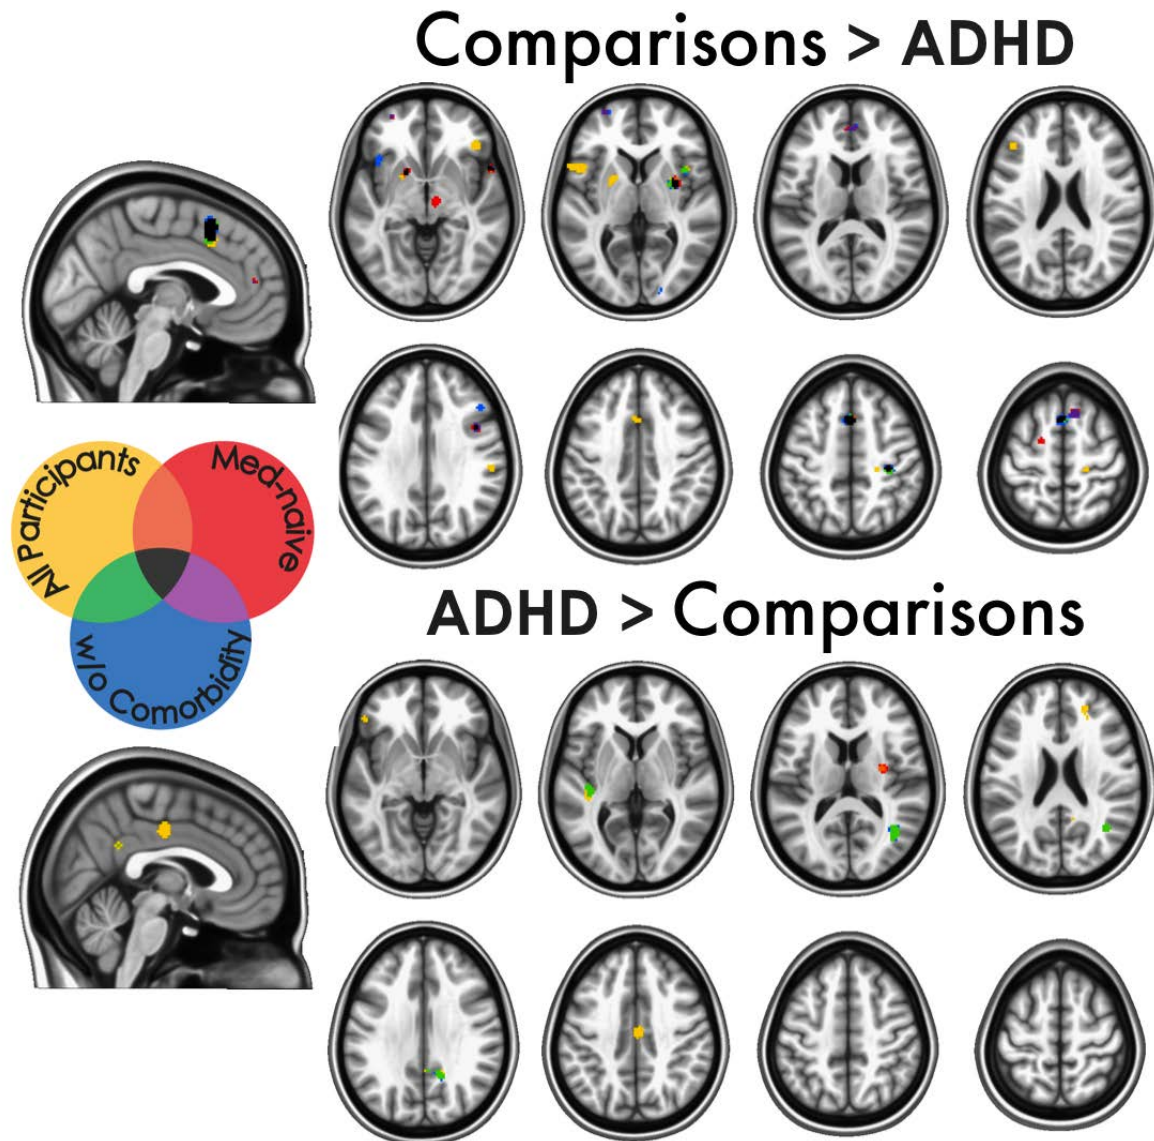

Footnote: R: Right; L: Left.

**Figure S2. Regions of ADHD-related hypo- or hyperactivation in relation to Yeo et al. (9) seven networks for the meta-analyses focused individuals without psychiatric comorbidities or stimulant-naïve.**

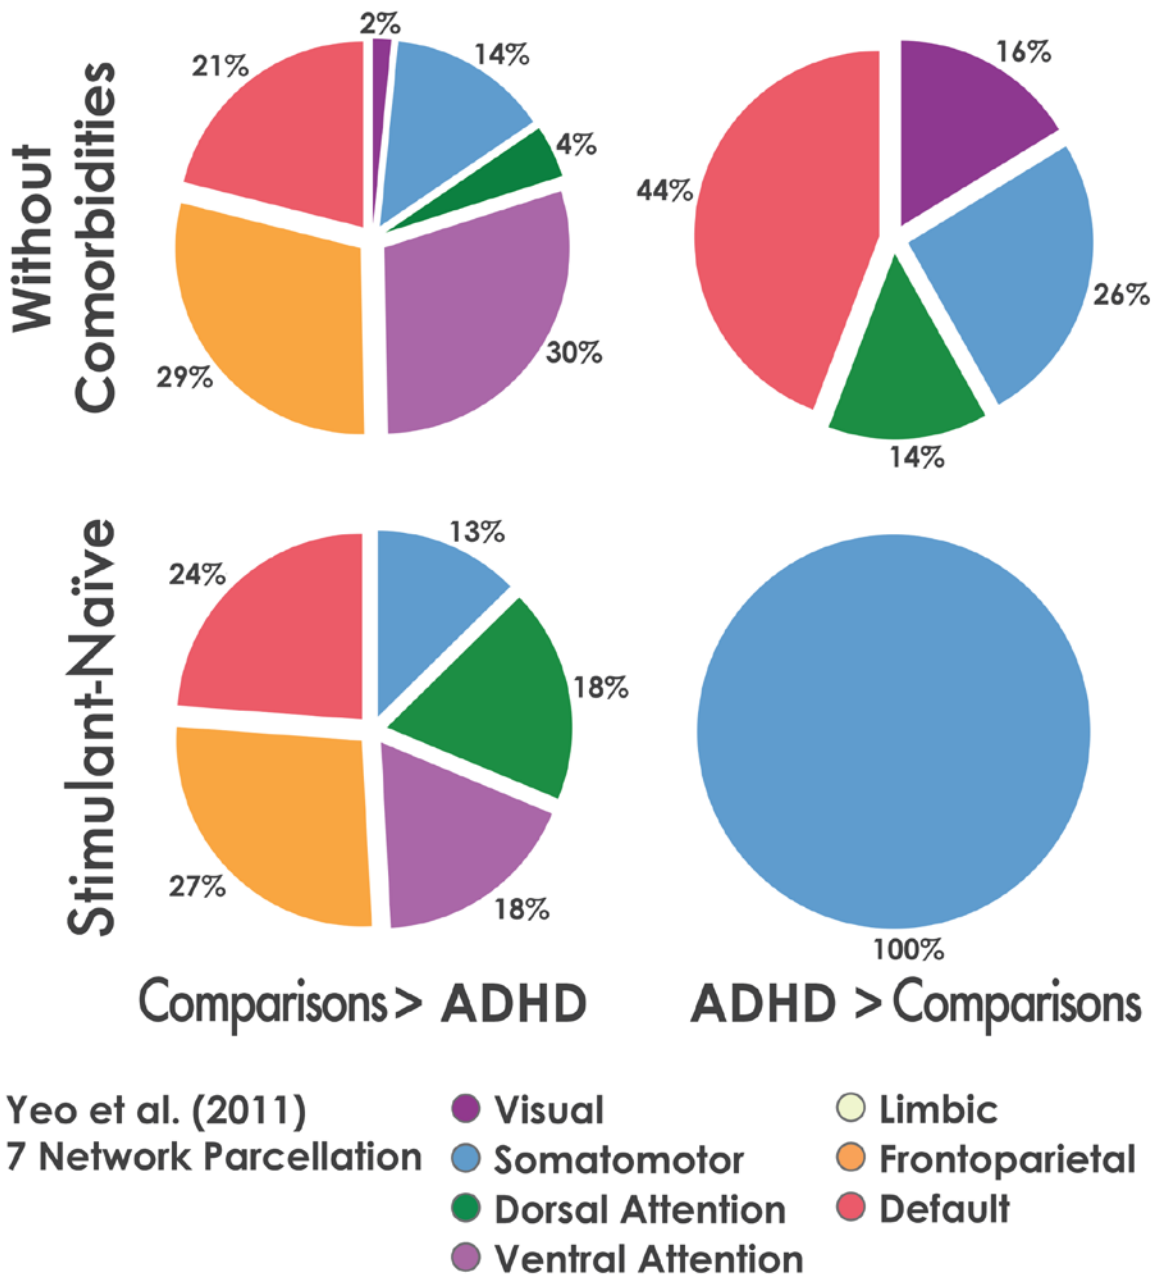

*Footnote: For the contrast ADHD > Comparisons, in stimulant-naïve, as shown in Supplemental Table S1, only one significant cluster was detected.*
